# Supplementary material
Source: publisher figshare collection journal article supplement (https://f1000.figshare.com/ndownloader/files/1203721)
Supplement: Supplementary file 1 [file 1203721]

ANIMAL	6.25	6.25 plus 20	6.25	6.25 plus 30	8.8	8.8 plus 20	8.8	8.8 plus 30	12.5	12.5 plus 20	12.5	12.5 plus 30	17.17	17.17 plus 20	17.17	17.17 plus 30	25	25 plus 20	25	25 plus 30
M1	472.8	127.2	241.5	335.5	279.9	320.1	438.6	147.8	267.0	328.1	514.8	85.2	180.4	419.6	396.7	131.6	365.1	232.7	361.6	234.1
M2	462.3	128.5	468.3	126.1	322.5	268.4	474.7	80.2	528.2	71.8	453.3	140	94.1	501.6	450.4	96.8	111.1	488.9	448.5	150
M3	195.3	392	383	217	234.5	358.7	362.3	233.6	262.1	325.7	193.9	336.8	211.5	386.7	348	252	319.1	280.9	258	342
M4	502.7	95.4	231	362	493.1	101.7	396.1	195.7	314.3	275.0	305.6	294.4	108.9	489.7	458.8	141.2	110.1	482.7	354.1	236.2
M5	303	297	386.5	211.8	276.4	310.5	336.3	259.5	340.8	252.7	386.5	198	204.5	383.5	291.9	300.9	249.7	350.3	206.9	389
M6	283	188	343.4	256.5	252.6	345.2	294.3	300.8	111.4	488.6	430.9	169.1	183.4	416.6	266	326.1	194.4	369.4	318.3	281.7
M7	291.4	254.7	289.5	301.3	16.6	291.8	320.8	273.1	183.2	405.1	323.3	275.8	323.4	276.6	459	136.7	316.7	269.9	382.5	217.5
M8	263	327	329.2	270.8	308.2	291.7	316.9	273.2	244.1	355.9	316.6	279.2	199.8	400.2	280.6	223.2	214.1	376.9	287.3	312.7
M9	347.2	249.7	311.2	287.1	322.4	277.6	455.9	137.3	341.4	253.5	310.4	289.6	241.6	354.1	398.9	197.1	234.7	365.2	410	190
M10	190.3	409.7	345.1	252.3	336.3	262.7	329.9	268.9	323.3	276.7	338	261.5	264.5	335.5	329.7	226.4	250.4	340.8	311.5	284.6
M11	266.9	324.4	259.9	336.4	526.8	67.3	381.6	200.2	243.1	341.8	375.3	210	286.5	297.8	330.6	269.4	166	415.8	439.6	160.4
M12	98.1	440.3	243.3	356.7	303.8	283.3	434.2	165.8	145.0	422.6	371.9	228.1	191.9	384.7	407.2	184.4	258.5	323.8	325.4	268.8
M13	145.8	448.1	409	188.3	200.3	381.5	249.6	347.3	9.2	565.9	294.4	303.8	296.9	300.2	254	342.3	395.9	204.1	285.3	314.2
M14	45.9	447.3	319.5	278.9	35.9	554.9	244.6	310	189.6	393.8	150.3	447.3	300.6	289.6	254.6	338	263.4	249.9	287.3	310.5
M15	207.6	377.8	317.7	281.6	377.7	222.3	542.9	54	212.1	387.9	253.9	346.1	280.1	311.1	481.9	110.2	97.9	502.1	448.6	151.4
